# Supplementary material for: Facilitation of Bone Healing Processes Based on the Developmental Function of Meox2 in Tooth Loss Lesion
Source: MDPI journal article supplement (doi:10.3390/ijms21228701), 2020-11-18
Supplement: s1 [file s1]

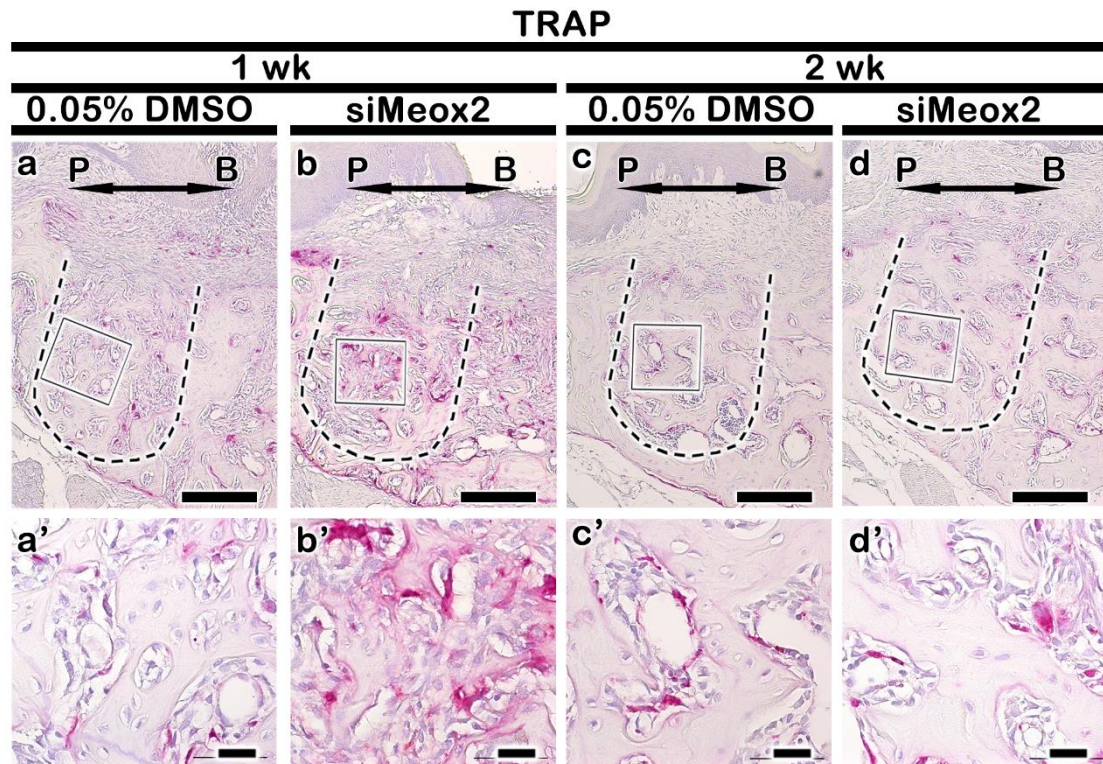

**Figure S1.** Osteoclast numbers during bone formation. The carrier-control-treated appecimens show higher number of TRAP-positive cells compared to siMeox2 treated specimens (a-d). After 2 weeks of treatment, TRAP-positive cells is higher in the carrier control-treated specimens than siMeox2 treated specimens (c, d). The solid boxes depict higher magnification views (a'-d'). Scale bars 200  $\mu$ m (a-d), 100  $\mu$ m (a'-d').

**Table S1.** Number of positive pre-osteoblast cells. Dotted box demarcates the 100  $\mu\text{m}^2$  area used for statistical analysis ( $n = 12$ ). The table of analysis determined using \*,  $p < 0.05$ .

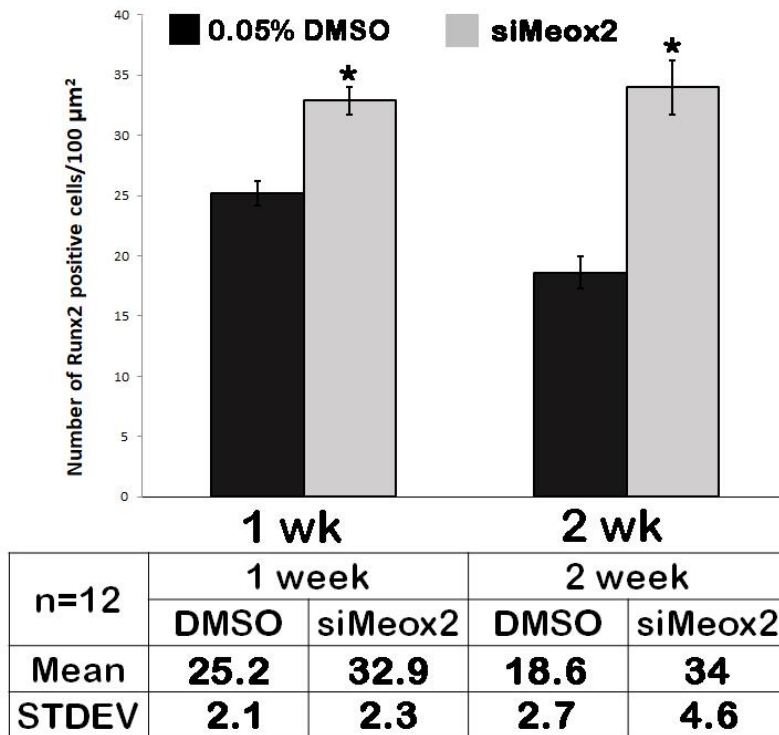

**Table S2.** Number of mice used for periodontitis induction.

| Number of periodontitis induced mice; (n) = number of mice for Micro-CT |            |                |
|-------------------------------------------------------------------------|------------|----------------|
| Period                                                                  | 0.05% DMSO | 100 nM siMeox2 |
| 1 week                                                                  | 4          | 4              |
| 2 week                                                                  | 4(3)       | 4(3)           |
| 3 week                                                                  | 4          | 4              |
| Total                                                                   | 12(3)      | 12(3)          |
